# Supplementary material for: Insights from single-strain and mixed culture experiments on the effects of heatwaves on freshwater flagellates
Source: PeerJ. 2024 Sep 12;12:e17912. doi: 10.7717/peerj.17912 (PMC11402338; doi:10.7717/peerj.17912)
Supplement: Supplemental Information 3 — The raw cell counts that were used to calculate growth rates and investigate community composition in the mixed cultures. [file peerj-12-17912-s003.xlsx]

## Sheet: raw_data_cell_counts
Flagellates (cells/mL)
	Day_1	Day_2	Day_3	Day_4	Day_5	Day_6	Day_7	Day_8
JBM10_Replicate1	38013.3	28510	133046	76026.5	66523.2	47516.6	38013.3	38013.3
JBM10_Replicate2	28510	19006.6	142550	114040	76026.5	57019.9	47516.6	38013.3
JBM10_Replicate3	28510	28510	66523.2	71274.9	57019.9	57019.9	65335.3	53456.2
AR4A6_Replicate1	38013.3	38013.3	152053	589206	798279	627219	456159	351623
AR4A6_Replicate2	28510	38013.3	85529.9	418146	484669	513179	503676	408643
AR4A6_Replicate3	47516.6	28510	85529.9	532186	627219	389636	313609	308858
JBMS11_Replicate1	19006.6	19006.6	38013.3	209073	76026.5	152053	114040	133046
JBMS11_Replicate2	28510	38013.3	28510	285100	380133	133046	85529.9	123543
JBMS11_Replicate3	9503.32	28510	35637.4	285100	285100	152053	95033.2	85529.9
Mix_Replicate1	28510	28510	123543	190066	85529.9	180563	85529.9	77214.5
Mix_Replicate2	28510	47516.6	66523.2	294603	47516.6	85529.9	76026.5	123543
Mix_Replicate3	38013.3	38013.3	85529.9	190066	47516.6	123543	76026.5	85529.9
Bacteria (cells/mL)
	Day_1	Day_2	Day_3	Day_4	Day_5	Day_6	Day_7	Day_8
JBM10_Replicate1	2.37464e+07	3.21153e+07	9.37133e+06	1.13268e+07	8.10752e+06	1.50152e+07	6.9493e+06	1.39402e+07
JBM10_Replicate2	1.95709e+07	2.772e+07	8.62426e+06	2.10795e+07	1.04774e+07	1.18376e+07	8.52329e+06	7.78084e+06
JBM10_Replicate3	2.08677e+07	2.64964e+07	8.14316e+06	1.92244e+07	1.4053e+07	1.02695e+07	10554622	8.75493e+06
AR4A6_Replicate1	1.52112e+07	3.08798e+07	1.97372e+07	1.4053e+07	7.88775e+06	1.17425e+07	6.20091e+06	4.6685e+06
AR4A6_Replicate2	1.50687e+07	2.56649e+07	2.02671e+07	1.50865e+07	8.76681e+06	8.27383e+06	4.98924e+06	7.16907e+06
AR4A6_Replicate3	1.46945e+07	3.24716e+07	1.98679e+07	9.04003e+06	9.65775e+06	8.17879e+06	5.16149e+06	7.75708e+06
JBMS11_Replicate1	2.05806e+07	2.9193e+07	4.02584e+07	1.94937e+07	1.05784e+07	1.75396e+07	1.09704e+07	1.37501e+07
JBMS11_Replicate2	2.48334e+07	2.88069e+07	3.16995e+07	3.63918e+07	1.41599e+07	1.86859e+07	1.84008e+07	1.70525e+07
JBMS11_Replicate3	2.57184e+07	2.4667e+07	2.51244e+07	2.34197e+07	1.03883e+07	1.67437e+07	1.23147e+07	1.28057e+07
Mix_Replicate1	2.7821e+07	2.13884e+07	1.03289e+07	1.60784e+07	1.36313e+07	8.17879e+06	7.65611e+06	9.25386e+06
Mix_Replicate2	2.09192e+07	3.20262e+07	1.0127e+07	1.69218e+07	1.31799e+07	1.41599e+07	7.50762e+06	8.75493e+06
Mix_Replicate3	2.38296e+07	3.47821e+07	1.25147e+07	2.26773e+07	6.07618e+06	1.62685e+07	1.2776e+07	1.34591e+07
relative share in Mix (%)
	Day_1	Day_2	Day_3	Day_4	Day_7
JBM10_Replicate1	29.73	31.4286	54.8193	54.375	13.2653
JBM10_Replicate2	35.48	29.5455	56.25	60.1307	10.5263
JBM10_Replicate3	35.14	27.2727	56.3636	52.9762	11.236
AR4A6_Replicate1	50	51.0638	34.4828	34.1772	32.381
AR4A6_Replicate2	45.83	51.3514	33.3333	33.7931	34.6667
AR4A6_Replicate3	46.43	53.0612	33.6134	34.9398	35.5769
JBMS11_Replicate1	21.21	20.5128	11.5385	11.9266	55.2941
JBMS11_Replicate2	20.59	19.5652	10.7843	10.274	56.5789
JBMS11_Replicate3	20	21.9512	11.194	10.8527	56.962
